# Supplementary material for: Anti-Inflammatory and Gut Microbiota Modulation Potentials of Flavonoids Extracted from Passiflora foetida Fruits
Source: MDPI journal article supplement (doi:10.3390/foods12152889), 2023-07-29
Supplement: s1 [file s1]

# Anti-Inflammatory and Gut Microbiota Modulation Potentials of Flavonoids Extracted from *Passiflora foetida* Fruits

Xiangpeng Han <sup>1,2,†</sup>, Ya Song <sup>1,2,†</sup>, Riming Huang <sup>1,2</sup>, Minqian Zhu <sup>1,2</sup>, Meiying Li <sup>1,2</sup>, Teresa Requena <sup>3,\*</sup> and Hong Wang <sup>1,2,\*</sup>

<sup>1</sup> Guangdong Provincial Key Laboratory of Food Quality and Safety, College of Food Science, South China Agricultural University, Guangzhou 510642, China; hanxp1996@163.com (X.H.);

songya\_1990@163.com (Y.S.); huangriming@scau.edu.cn (R.H.); zhuminqian@stu.scau.edu.cn (M.Z.); lmy1982@scau.edu.cn (M.L.)

<sup>2</sup> Guangdong Laboratory for Lingnan Modern Agriculture, Guangzhou 510642, China

<sup>3</sup> Instituto de Investigación en Ciencias de la Alimentación CIAL (CSIC), Campus UAM Cantoblanco, 28049 Madrid, Spain

\* Correspondence: t.requena@csic.es (T.R.); gzwzhongd@scau.edu.cn (H.W.)

† These authors contributed equally to this work.

**Citation:** Han, X.; Song, Y.; Huang, R.; Zhu, M.; Li, M.; Requena, T.; Wang, H. Anti-Inflammatory and Gut Microbiota Modulation Potentials of Flavonoids Extracted from *Passiflora foetida* Fruits. *Foods* **2023**, *12*, x. <https://doi.org/10.3390/xxxx>

Academic Editor: Victor Rodov

Received: 7 July 2023

Revised: 25 July 2023

Accepted: 25 July 2023

Published: 27 July 2023

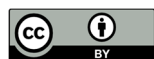

**Copyright:** © 2023 by the authors. Submitted for possible open access publication under the terms and conditions of the Creative Commons Attribution (CC BY) license (<https://creativecommons.org/licenses/by/4.0/>).

**Table S1** Primers and amplification conditions for real-time PCR assays.

| Bacterial group           | Primers   | Primer sequence and direction (5'–3') | Product size (bp) | Annealing T (°C) | Time (s) |
|---------------------------|-----------|---------------------------------------|-------------------|------------------|----------|
| <i>Alistipes</i>          | AlstpF    | F: 5' GTACTAATTCCCCATAACATTCGAG 3'    | 83                | 60               | 40       |
|                           | AlstpR    | R: 5' CTAATACAACGCATGCCCATCTT 3'      |                   |                  |          |
| <i>Bifidobacterium</i>    | Bif-F     | F: 5' CTCCTGGAAACGGGTGG 3'            | 593               | 55               | 40       |
|                           | Bif-R     | R: 5' GGTGTTCTTCCCGATATCTACA 3'       |                   |                  |          |
| <i>Bilophia</i>           | BwF       | F: 5' AAGTCCTTCGGGGCGAGTAA 3'         | 239               | 60               | 40       |
|                           | BwR       | R: 5' ATCCTCTCAGACCGGCTAC 3'          |                   |                  |          |
| <i>Enterobacteriaceae</i> | F-ent     | F: 5' ATGGCTGTCGTCAGCTCGT 3'          | 385               | 55               | 40       |
|                           | R-ent     | R: 5' CCTACTTCTTTTGCAACCCACTC3'       |                   |                  |          |
| <i>Enterococcus</i>       | g-Encoc-F | F: 5' ATCAGAGGGGGATAAACTT 3'          | 336               | 55               | 40       |
|                           | g-Encoc-R | R: 5' ACTCTCATCCTTGTCTTCTC 3'         |                   |                  |          |
| <i>Lactobacillus</i>      | Lab-F362  | F: 5' AGCAGTAGGGAATCTTCCA 3'          | 341               | 58               | 40       |
|                           | Lab-R677  | R: 5' CACCGCTACACATGGAG 3'            |                   |                  |          |
| <i>Roseburia</i>          | RosF1     | F: 5' GCGGTRCGGCAAGTCTGA 3'           | 81                | 60               | 40       |
|                           | RosR1     | R: 5' CCTCCGACACTCTAGTMCGAC 3'        |                   |                  |          |

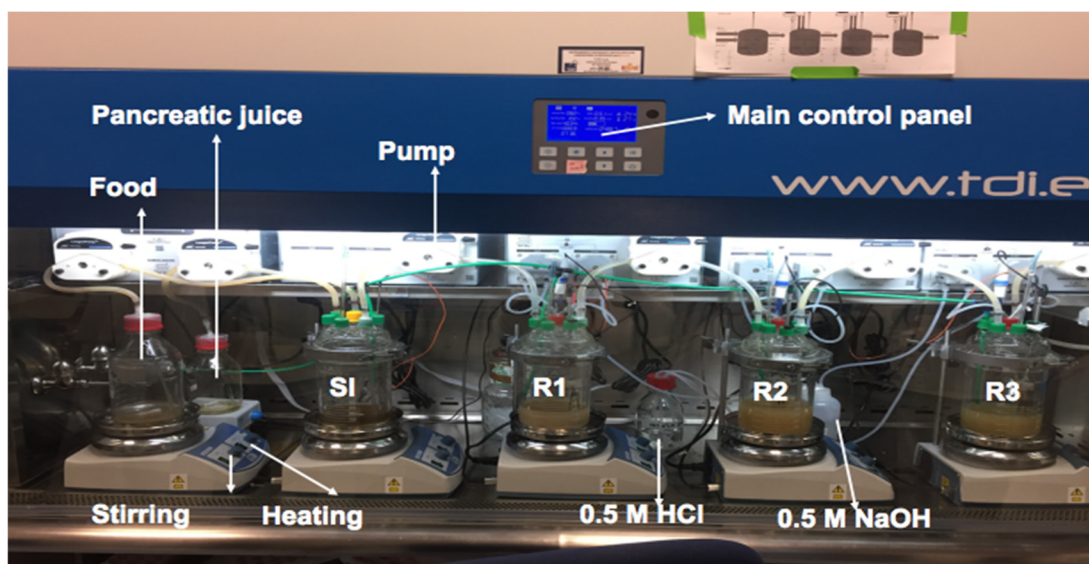

**Figure S1** Schematic diagram of the BFBL gut model.

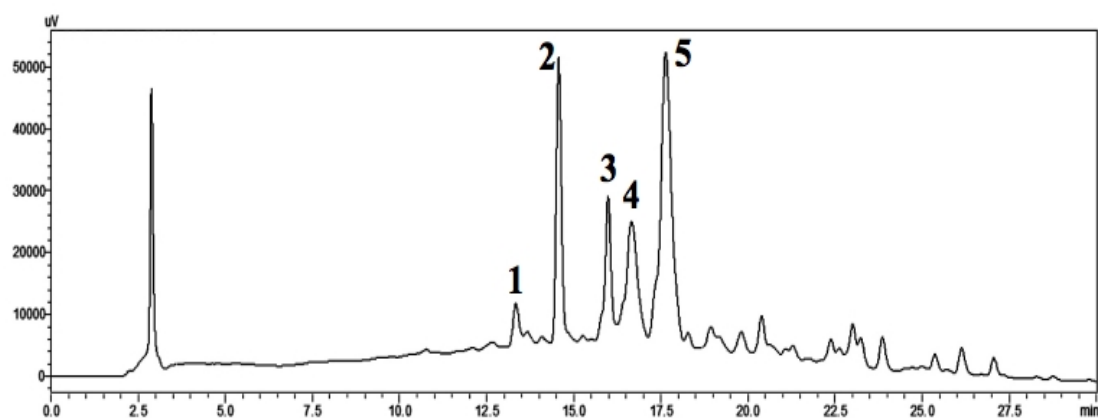

**Figure S2** HPLC chromatography spectrum of PFF.

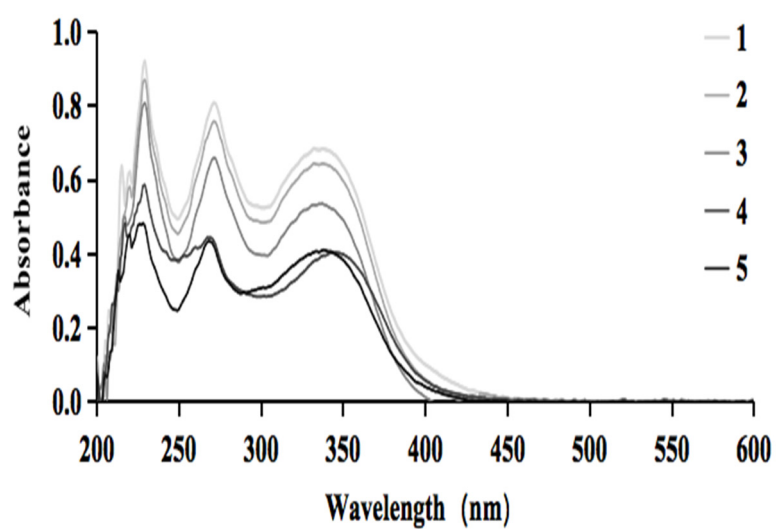

**Figure S3** The UV spectra of purified compounds 1-5.

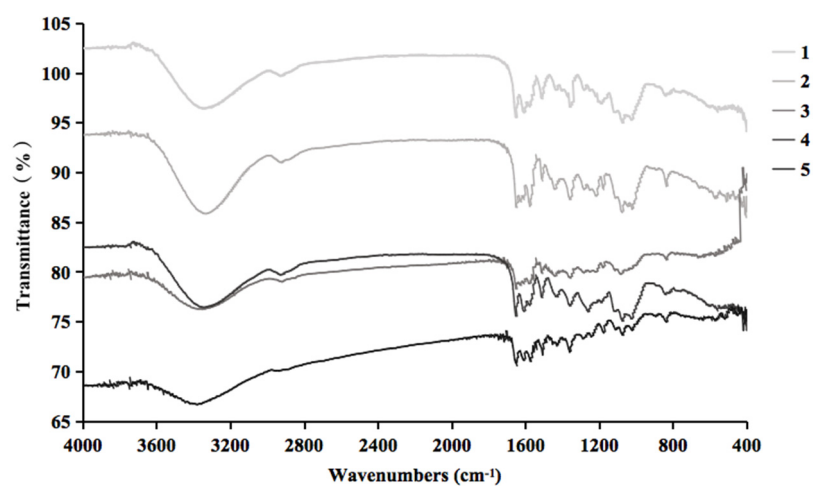

**Figure S4** The FT-IR spectra of purified compounds 1-5.

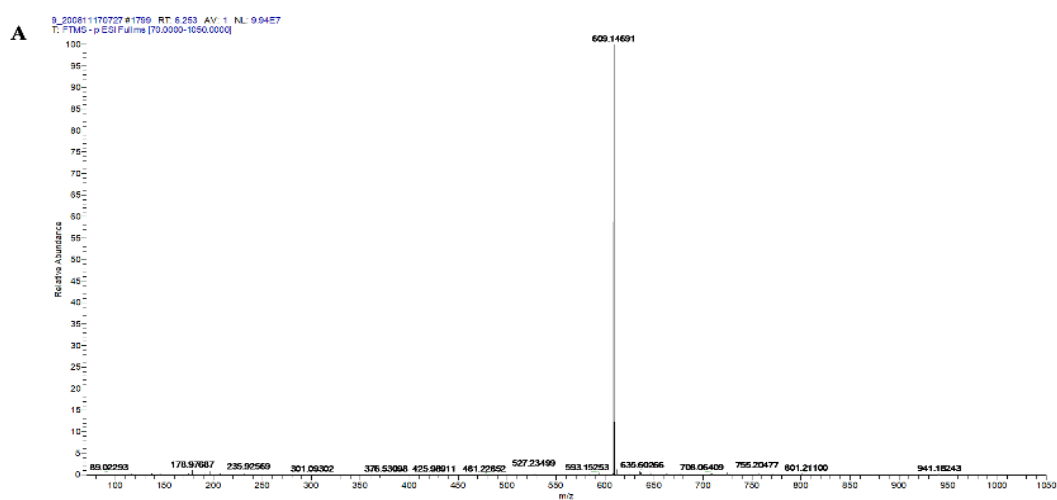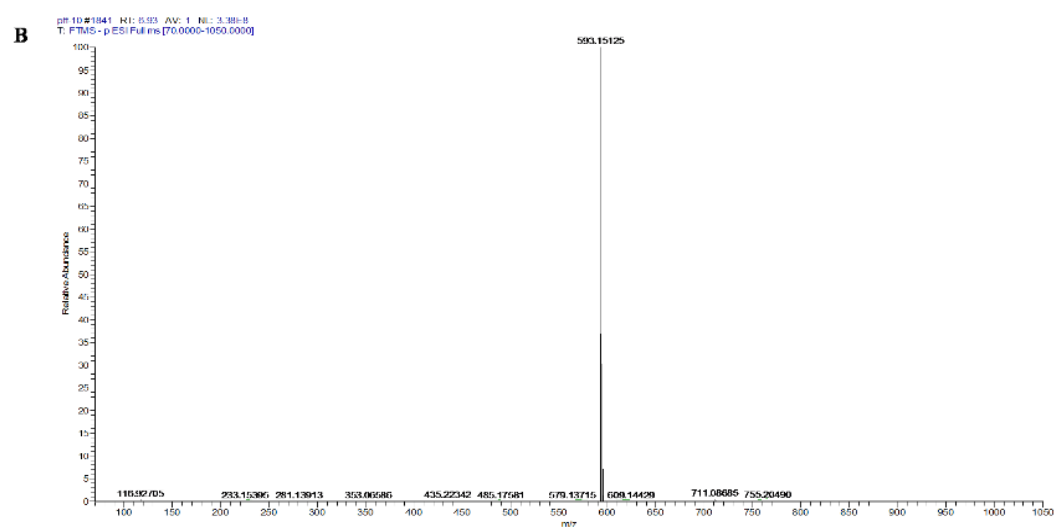

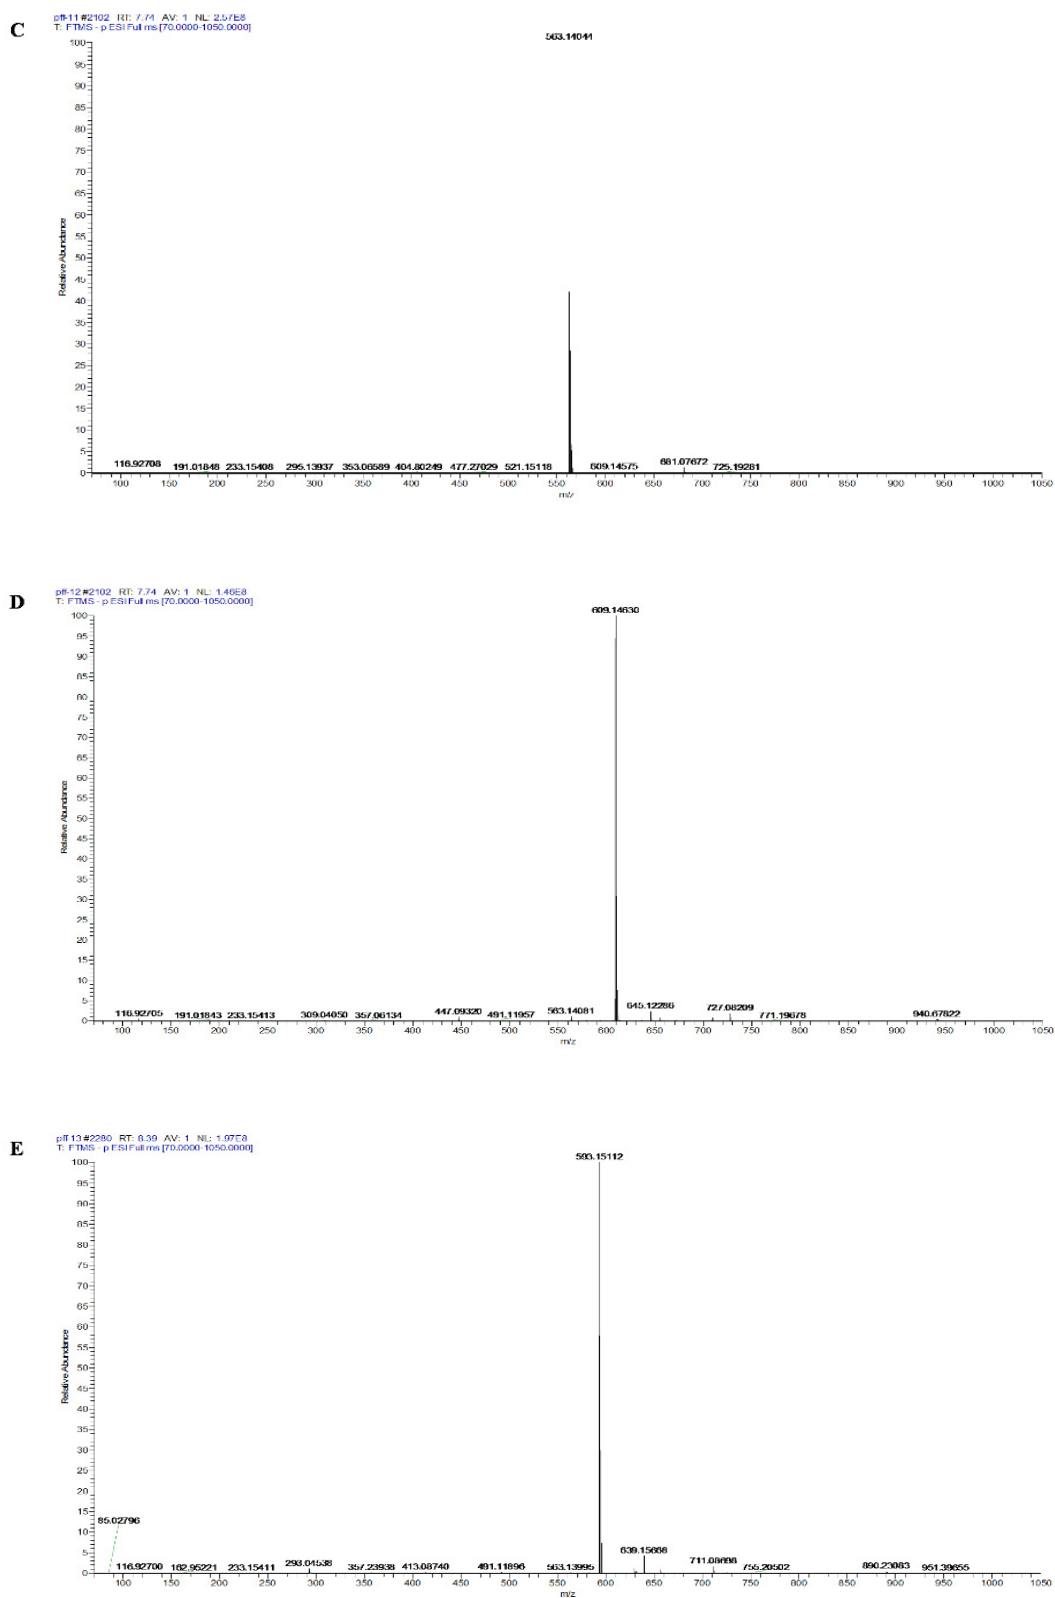

**Figure S5** The LC-ESI-MS spectra of purified compound 1 (A), 2 (B), 3 (C), 4 (D), and 5

(E).
